# Supplementary material
Source: publisher site journal article supplement (https://www.spandidos-publications.com/5526/downloadSupplementary)
Supplement: Supplementary file 1 [file downloadSupplementary]

## Sheet: Enriched GO
The information of GO annotation and protein pathway enrichment.
GO annotation		Gene numbers	Color
Biological process	Cellular process	201	Red
	Metabolic process	141	Red
	Cellular metabolic process	135	Red
	Organic substance metabolic process	131	Red
	Primary metabolic process	124	Red
	Nitrogen compound metabolic process	116	Red
	Macromolecule metabolic process	102	Red
	Organelle organization	67	Red
	Cellular nitrogen compound metabolic process	65	Red
	Organic cyclic compound metabolic process	61	Red
	Heterocycle metabolic process	58	Red
	Cellular aromatic compound metabolic process	58	Red
	Biosynthetic process	56	Red
	Nucleobase-containing compound metabolic process	54	Red
	Organic substance biosynthetic process	54	Red
	Nucleic acid metabolic process	47	Red
	Organonitrogen compound catabolic process	28	Red
	ncRNA transcription	8	Red
	snRNA transcription by RNA polymerase II	7	Red
Cellular component	Intracellular	211	Blue
	Organelle	198	Blue
	Intracellular organelle	189	Blue
	Membrane-bounded organelle	185	Blue
	Cytoplasm	176	Blue
	Intracellular membrane-bounded organelle	164	Blue
	Nucleus	119	Blue
	Intracellular organelle lumen	109	Blue
	Cytosol	96	Blue
	Nuclear lumen	85	Blue
	Protein-containing complex	84	Blue
	Intracellular non-membrane-bounded organelle	81	Blue
	Nucleoplasm	77	Blue
	Mitochondrion	35	Blue

## Sheet: GO-dot bubble plots
The information of GO annotation and protein pathway enrichment.
GO annotation	P value	Enrichment	FDR	Gene numbers	Class
Cellular process	2.1e-05	4.67778	0.03	201	Biological process
Metabolic process	5.17e-09	8.28651	3.32e-05	141	Biological process
Cellular metabolic process	3.25e-10	9.48812	4.18e-06	135	Biological process
Organic substance metabolic process	7.11e-08	7.14813	0.0003	131	Biological process
Primary metabolic process	2.59e-07	6.5867	0.00083	124	Biological process
Nitrogen compound metabolic process	1.02e-06	5.9914	0.0026	116	Biological process
Macromolecule metabolic process	2.2e-05	4.65758	0.03	102	Biological process
Organelle organization	1.23e-05	4.91009	0.0226	67	Biological process
Cellular nitrogen compound metabolic process	9.36e-06	5.02872	0.0201	65	Biological process
Organic cyclic compound metabolic process	2.86e-05	4.54363	0.03	61	Biological process
Heterocycle metabolic process	1.4e-05	4.85387	0.0226	58	Biological process
Cellular aromatic compound metabolic process	2.15e-05	4.66756	0.03	58	Biological process
Biosynthetic process	3.31e-05	4.48017	0.03	56	Biological process
Nucleobase-containing compound metabolic process	3.56e-05	4.44855	0.03	54	Biological process
Organic substance biosynthetic process	7.49e-05	4.12552	0.0498	54	Biological process
Nucleic acid metabolic process	3.03e-05	4.51856	0.03	47	Biological process
Organonitrogen compound catabolic process	7.36e-05	4.13312	0.0498	28	Biological process
ncRNA transcription	2.63e-05	4.58004	0.03	8	Biological process
snRNA transcription by RNA polymerase II	3.33e-05	4.47756	0.03	7	Biological process
Intracellular	3.04e-13	12.5171	5.16e-10	211	Cellular component
Organelle	9.22e-10	9.03527	5.88e-07	198	Cellular component
Intracellular organelle	6.92e-10	9.15989	5.88e-07	189	Cellular component
Membrane-bounded organelle	1.13e-08	7.94692	3.84e-06	185	Cellular component
Cytoplasm	4.18e-09	8.37882	1.78e-06	176	Cellular component
Intracellular membrane-bounded organelle	2.07e-07	6.68403	3.91e-05	164	Cellular component
Nucleus	9.9e-06	5.00436	0.0014	119	Cellular component
Intracellular organelle lumen	1.83e-08	7.73755	5.18e-06	109	Cellular component
Cytosol	4e-07	6.39794	6.8e-05	96	Cellular component
Nuclear lumen	1e-05	5	0.0014	85	Cellular component
Protein-containing complex	0.00024	3.61979	0.0288	84	Cellular component
Intracellular non-membrane-bounded organelle	0.00031	3.50864	0.0346	81	Cellular component
Nucleoplasm	2.04e-06	5.69037	0.00031	77	Cellular component
Mitochondrion	0.00033	3.48149	0.0346	35	Cellular component

## Sheet: Enriched pathway
The information of GO annotation and protein pathway enrichment.
Pathways	Gene numbers
Establishment of protein localization	41
Protein transport	38
Organonitrogen compound catabolic process	32
Regulation of organelle organization	28
Cellular protein catabolic process	23
Proteolysis involved in cellular protein catabolic process	22
Generation of precursor metabolites and energy	18
NcRNA transcription	9
SnRNA transcription by RNA polymerase II	8
SnRNA transcription	8
ADP metabolic process	8
Nucleoside diphosphate phosphorylation	8
Nucleotide phosphorylation	8
Purine nucleoside diphosphate metabolic process	8
Ribonucleoside diphosphate metabolic process	8
Transport of virus	7
Multi-organism transport	7
Multi-organism localization	7
SnRNA transcription by RNA polymerase III	3

## Sheet: Pathway-dot bubble plots
Table SIII. The information of GO annotation and protein pathway enrichment.
Pathway	Fold Enrichment	Enrichment FDR	Gene numbers
Establishment of protein localization	1.9	0.018	41
Protein transport	1.9	0.029	38
Organonitrogen compound catabolic process	2	0.029	32
Regulation of organelle organization	2.1	0.029	28
Cellular protein catabolic process	2.4	0.029	23
Proteolysis involved in cellular protein catabolic process	2.4	0.029	22
Generation of precursor metabolites and energy	2.9	0.021	18
NcRNA transcription	7.3	0.005	9
SnRNA transcription by RNA polymerase II	9.7	0.0034	8
SnRNA transcription	9.6	0.0034	8
ADP metabolic process	5.8	0.028	8
Nucleoside diphosphate phosphorylation	5.4	0.029	8
Nucleotide phosphorylation	5.3	0.029	8
Purine nucleoside diphosphate metabolic process	5.3	0.029	8
Ribonucleoside diphosphate metabolic process	5.2	0.031	8
Transport of virus	9.1	0.0087	7
Multi-organism transport	8.8	0.0087	7
Multi-organism localization	8.8	0.0087	7
SnRNA transcription by RNA polymerase III	35	0.026	3
